# Supplementary material for: Integrated spatial transcriptome and metabolism study reveals metabolic heterogeneity in human bladder cancer
Source: Research Square preprint supplement (doi:10.21203/rs.3.rs-5894269/v1), 2025-01-28
Supplement: Supplementary file 1 [file 18b967c953bd4e5b8098aca9.docx]

**Supplementary Table S1. The type and quantity of metabolites detected by ST.**

| **Class. I** | **Class. II** | **Class. II count** | **Class. I count** |
| --- | --- | --- | --- |
| Alcohol and amines | Alcohols | 43 | 121 |
| Amines | 73 |
| Polyamines | 5 |
| Aldehyde, Ketones, Esters | Aldehydes | 2 | 162 |
| Esters | 59 |
| Ketones | 101 |
| Amino acid and Its metabolites | Amino acid derivatives | 34 | 318 |
| Amino acids | 8 |
| Small Peptide | 248 |
| polypeptide | 28 |
| Benzene and substituted derivatives | Benzene and substituted derivatives | 70 | 74 |
| Phenolics | 4 |
| Bile acids | Bile acids | 3 | 3 |
| Carbohydrates and Its metabolites | Carbohydrates and Its metabolites | 4 | 17 |
| Sugar acids | 1 |
| Sugar derivatives | 4 |
| Sugars | 8 |
| CoEnzyme and vitamins | CoEnzyme and vitamins | 5 | 5 |
| FA | CAR | 10 | 64 |
| CE | 4 |
| FFA | 3 |
| Others | 36 |
| Oxidized lipids | 11 |
| GL | DG | 46 | 76 |
| MG | 6 |
| TG | 24 |
| GP | CL | 1 | 168 |
| LPA | 1 |
| LPC | 8 |
| LPC_P | 2 |
| LPE | 3 |
| PA | 24 |
| PC | 33 |
| PC_O | 1 |
| PC_P | 1 |
| PE | 47 |
| PG | 10 |
| PGP | 8 |
| PI | 7 |
| PIP | 12 |
| PS | 10 |
| Heterocyclic compounds | Heterocyclic compounds | 12 | 12 |
| Hormones and hormone related compounds | Hormones and hormone related compounds | 29 | 29 |
| Nucleotide and Its metabolites | Nucleotide and Its metabolites | 44 | 44 |
| Organic acid and Its derivatives | Organic acid and Its derivatives | 212 | 230 |
| Phosphoric acids | 14 |
| Sulfonic acids | 4 |
| SL | Cer | 20 | 34 |
| SL | 1 |
| SM | 12 |
| SPH | 1 |
| ST | CE | 1 | 1 |
| Tryptamines, Cholines, Pigments | Cholines | 2 | 4 |
| Pigments | 1 |
| Tryptamines | 1 |

**Supplementary Table S2. Hallmark Overrepresentation table of all the genes mentioned in the paper.**

| **Cancer Hallmark** | **Overlap** | **P value** | **Hallmark vs. hallmark** | **Genes** |
| --- | --- | --- | --- | --- |
| Sustaining Proliferative Signaling | 6/3574 | 0.65063 | 0.58 | PRKAA2; PRKAG1; AKT1; CHKA; SGPL1; SPHK1 |
| Genome Instability | 2/747 | 0.39205 | 0.92 | FH; AKT1 |
| Evading Growth Suppressors | 4/3288 | 0.87354 | 0.42 | PRKAA2; PRKAG1; AKT1; SPHK1 |
| Evading Immune Destruction | 2/749 | 0.39335 | 0.92 | SPHK1; AKT1 |
| Sustained Angiogenesis | 5/796 | 0.01267 | 2.16 | AKT1; SGPL1; PIK3R6; SDHA; SPHK1 |
| Tissue Invasion and Metastasis | 3/2318 | 0.81031 | 0.44 | SPHK1; AKT1; PIK3R6 |
| Tumor-Promoting Inflammation | 1/769 | 0.75882 | 0.45 | AKT1 |
| Resisting Cell Death | 7/1941 | 0.05143 | 1.24 | PRKAA2; PRKAG1; AKT1; SGPL1; PRKAG3; PRKAG2; SPHK1 |
| Reprogramming Energy Metabolism | 13/740 | <1e-6 | 6.04 | PRKAA2; PRKAG1; IDH1; FH; MDH2; AKT1; SDHB; IDH2; PRKAG3; SDHA; DLAT; PRKAG2; ACO1 |
| Replicative Immortality | 2/547 | 0.25841 | 1.26 | SPHK1; AKT1 |

**Supplementary Figure S1**


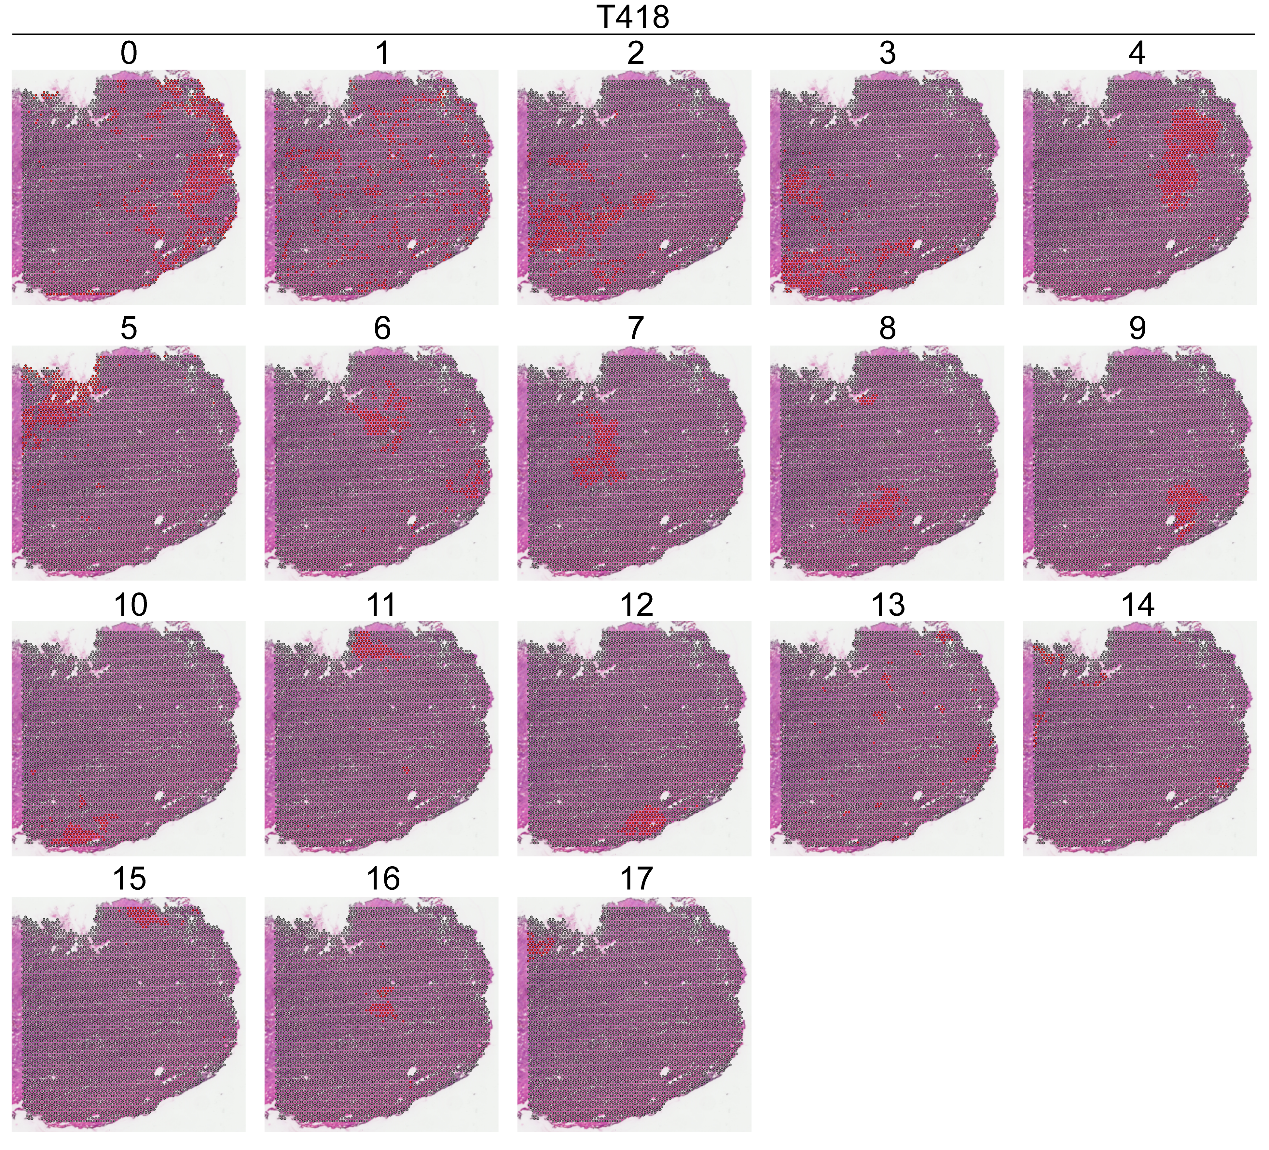


**Fig.S1. The Distribution of each Subset in T418.**

**Supplementary Figure S2**

**
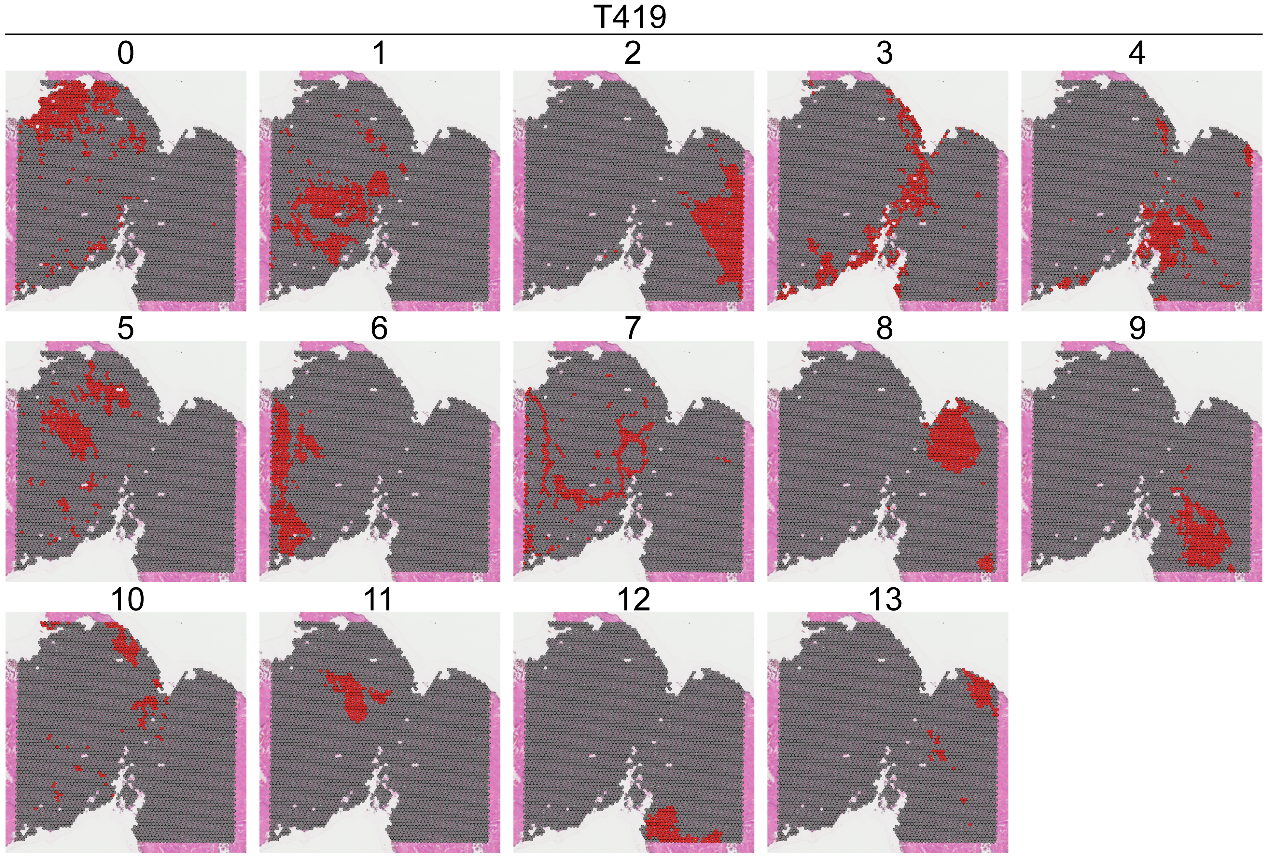
**

**Fig.S2. The Distribution of each Subset in T419.**

**Supplementary Figure S3**

**
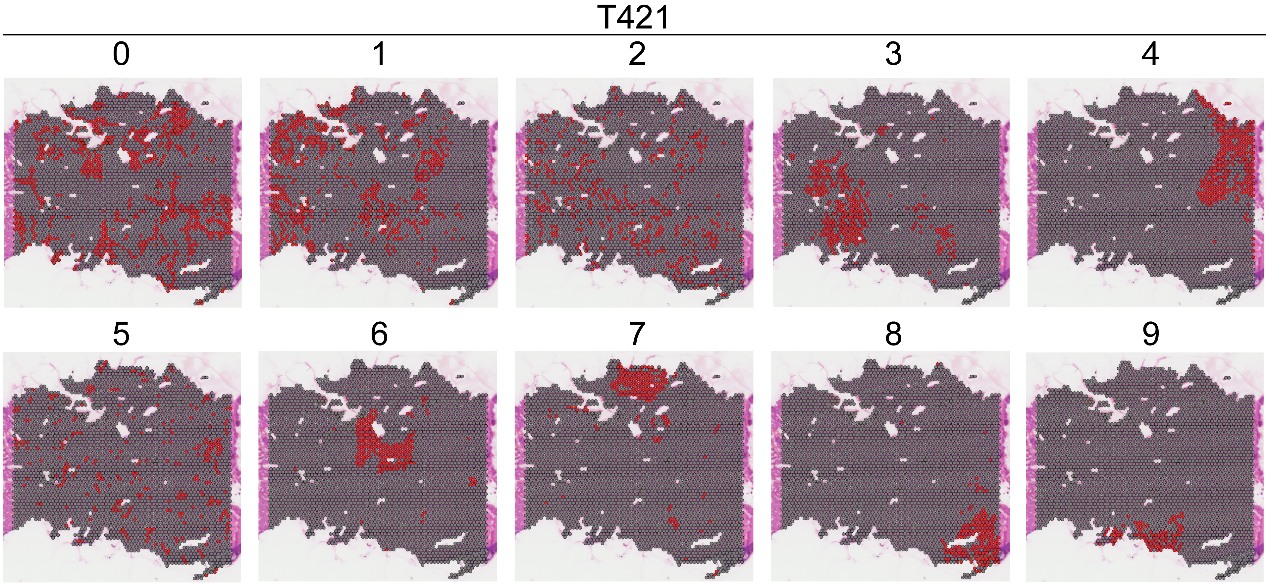
**

**Fig.S3. The Distribution of each Subset in T421.**

**Supplementary Figure S4**

**
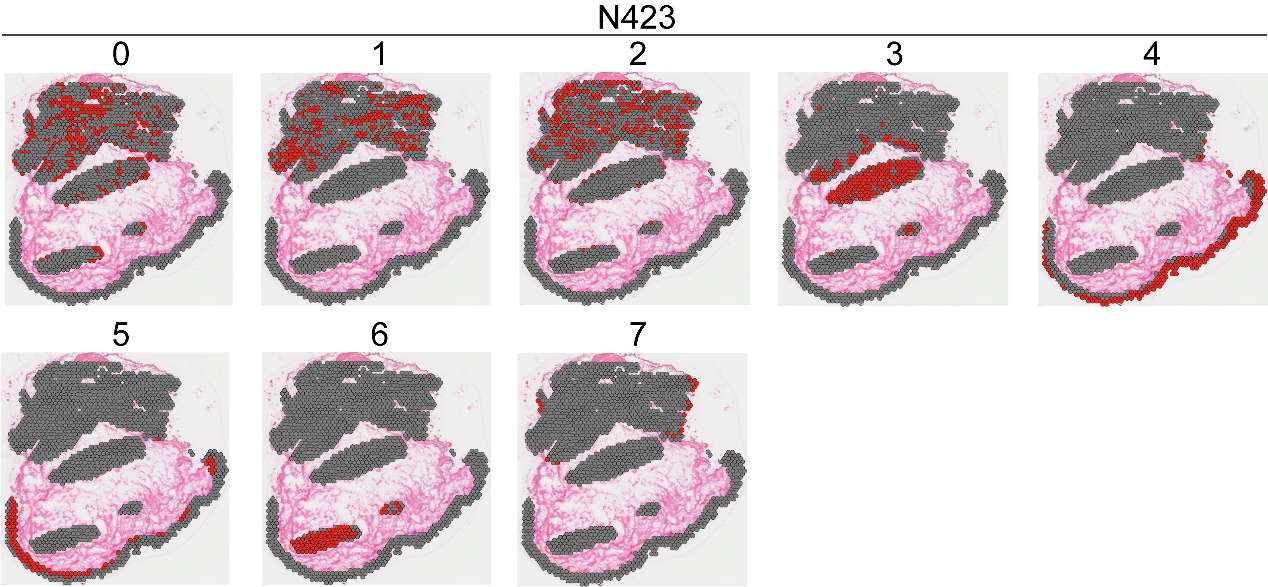
**

**Fig.S4. The Distribution of each Subset in N423.**

**Supplementary Figure S5**

**
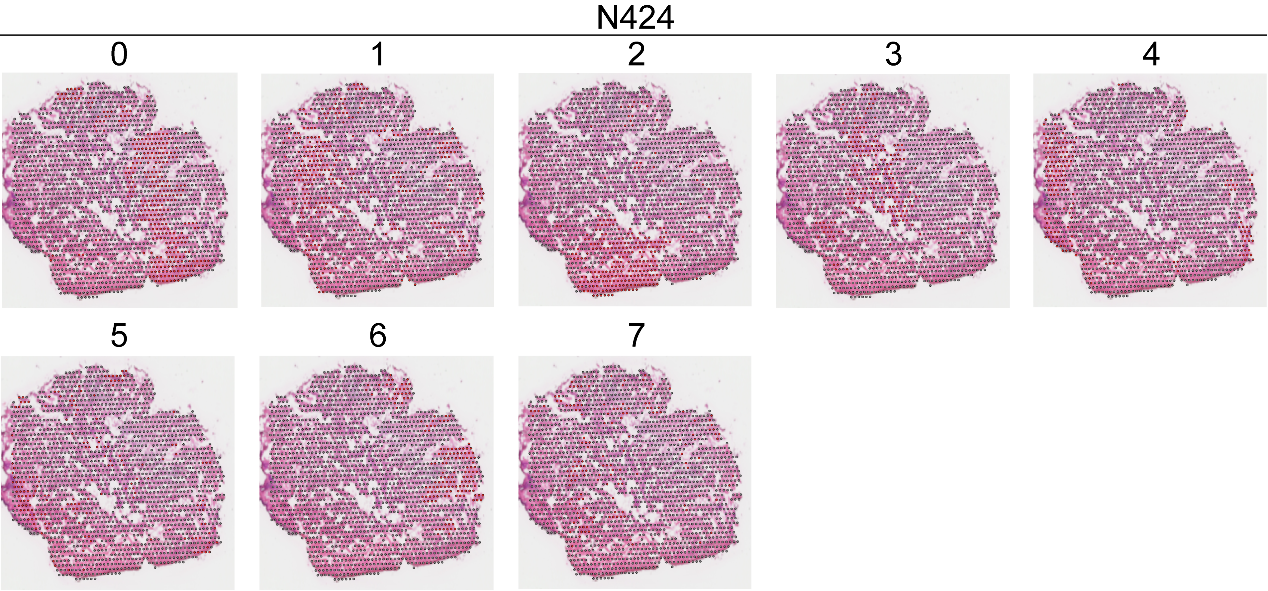
**

**Fig.S5. The Distribution of each Subset in N424.**

**Supplementary Figure S6**

**
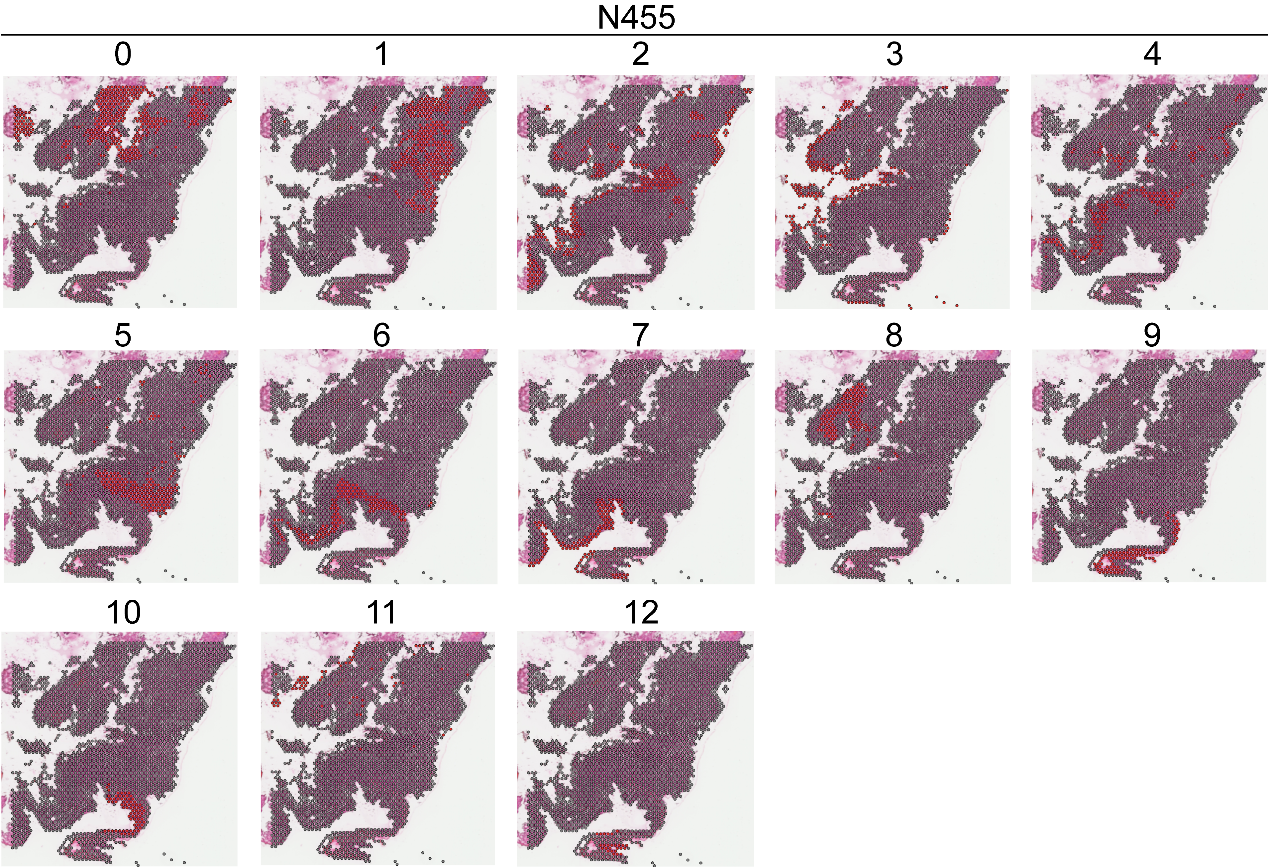
**

**Fig.S6. The Distribution of each Subset in N455.**

**Supplementary Figure S7**


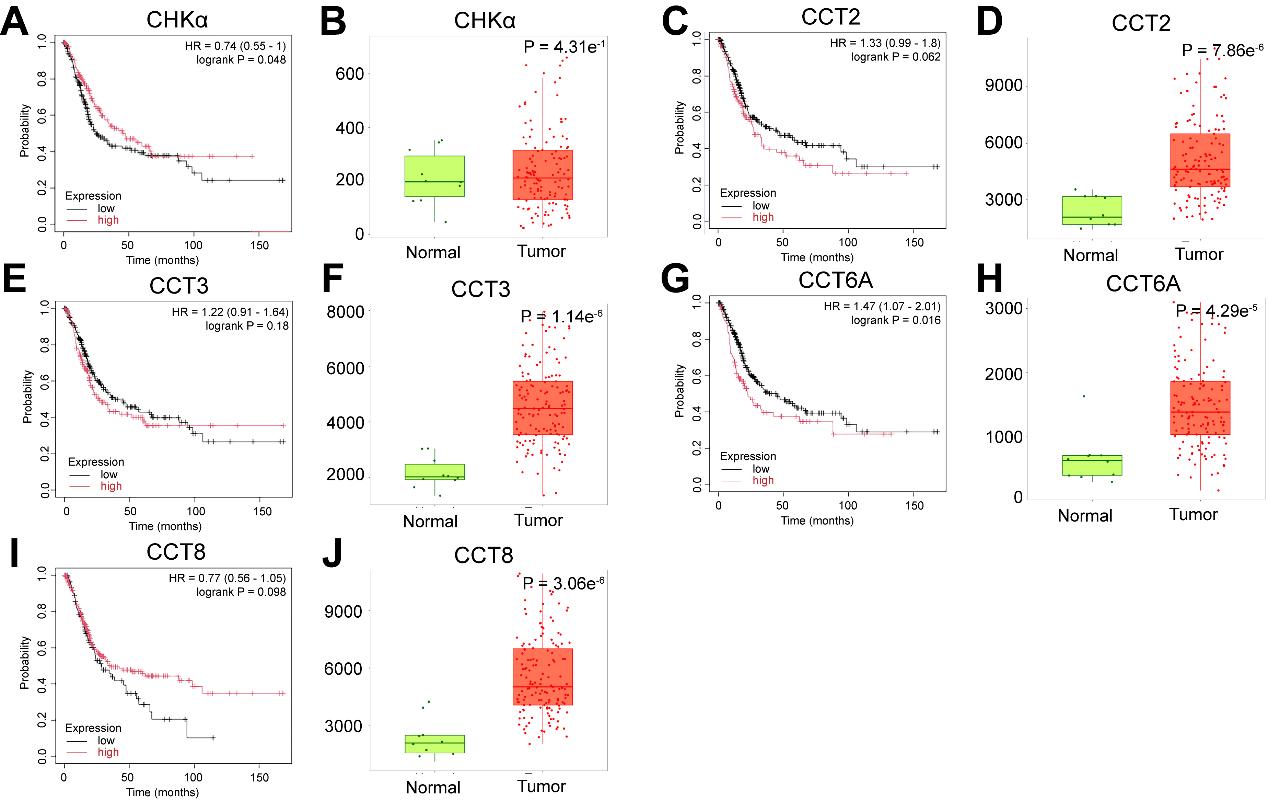


**Fig.S7. Correlation between gene expression and Overall Survivor (OS) probability in BC tissues, and gene expression levels between normal tissues and BC tissues.**

(**A, C, E, G, I**) Correlation between the expression of CHKα, CCT2, CCT3, CCT6A, CCT8 and OS probability in BC tissues.

(**B, D, F, H, J**) The expression levels of CHKα, CCT2, CCT3, CCT6A and CCT8 between normal tissues and BC tissues.

**Supplementary Figure S8**


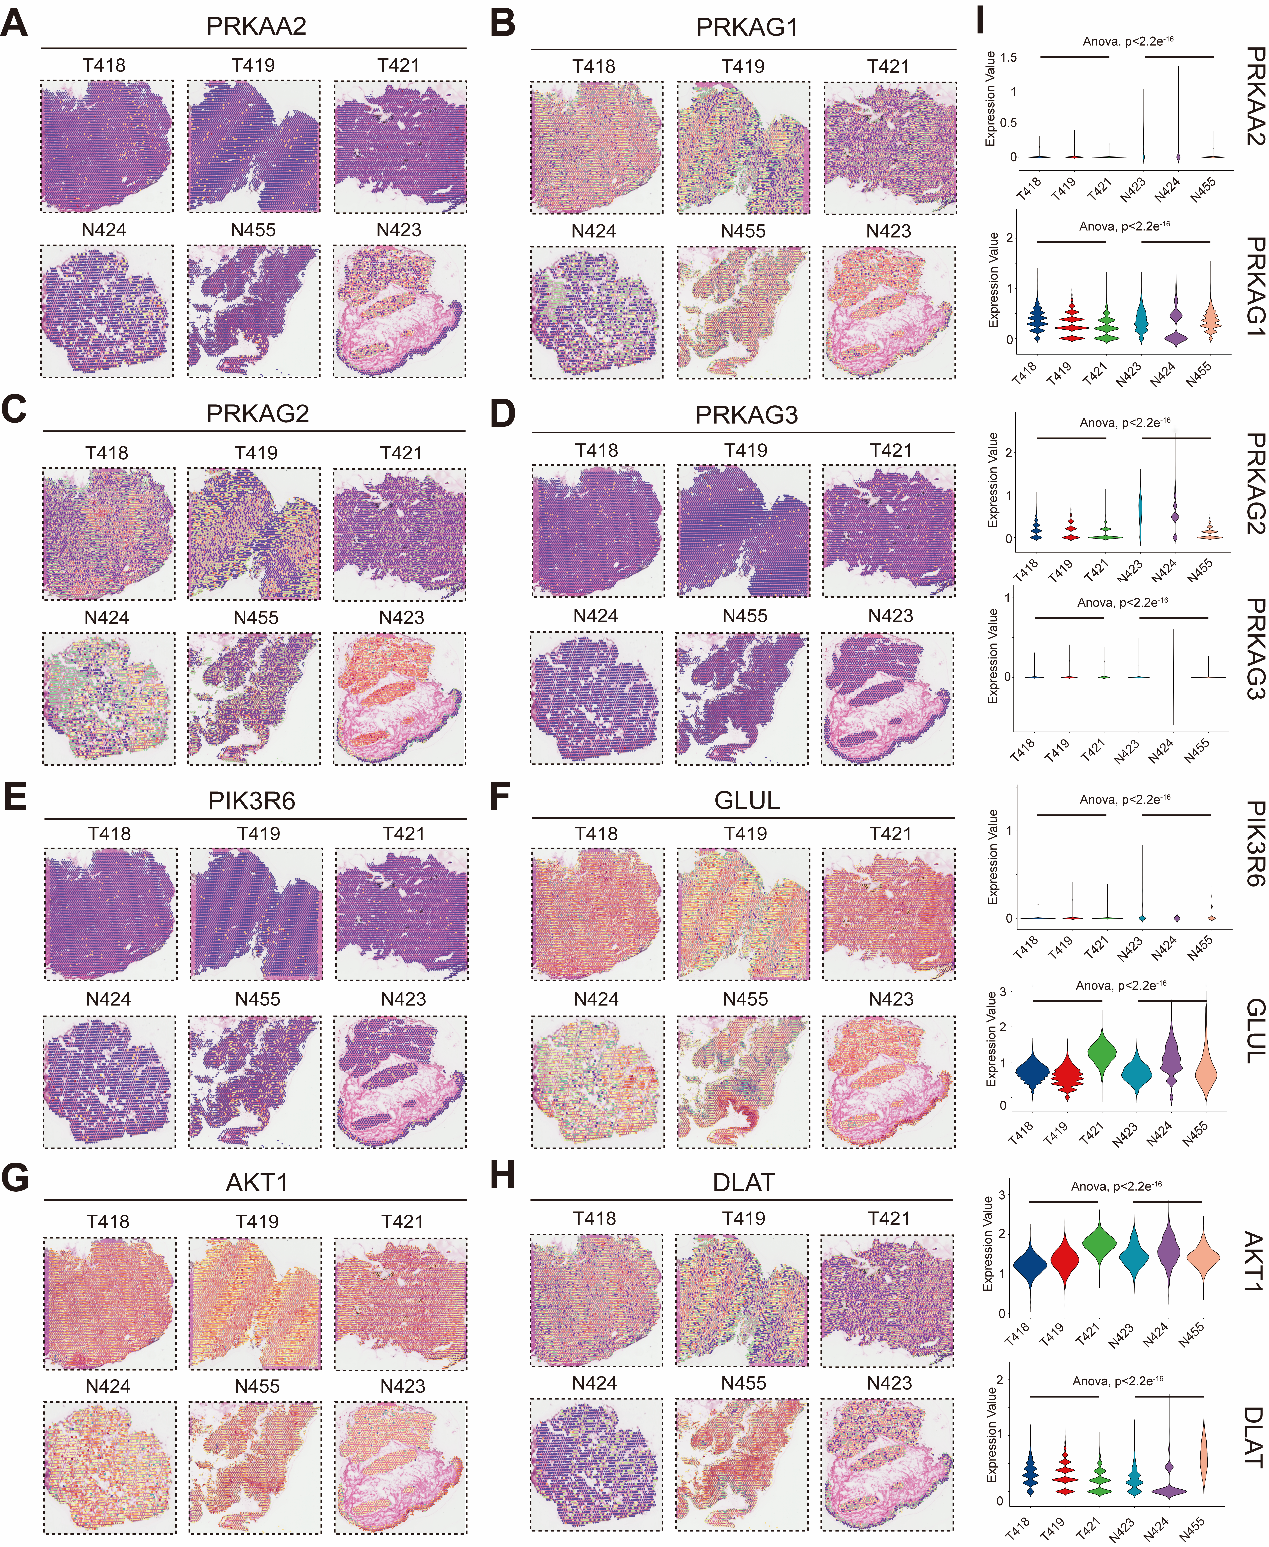


**Fig.S8. Downregulation of AMPK Pathway in BC Tissues.**

(**A** - **H**) Distribution of PRKAA2, PRKAG1, PRKAG2, PRKAG3, PIK3R6, GLUL, AKT1 and DLAT in cancerous and adjacent non-cancerous tissues.

(**I**) Violin plots illustrating the expression levels of genes in cancerous versus adjacent non-cancerous tissues.

**Supplementary Figure S9**


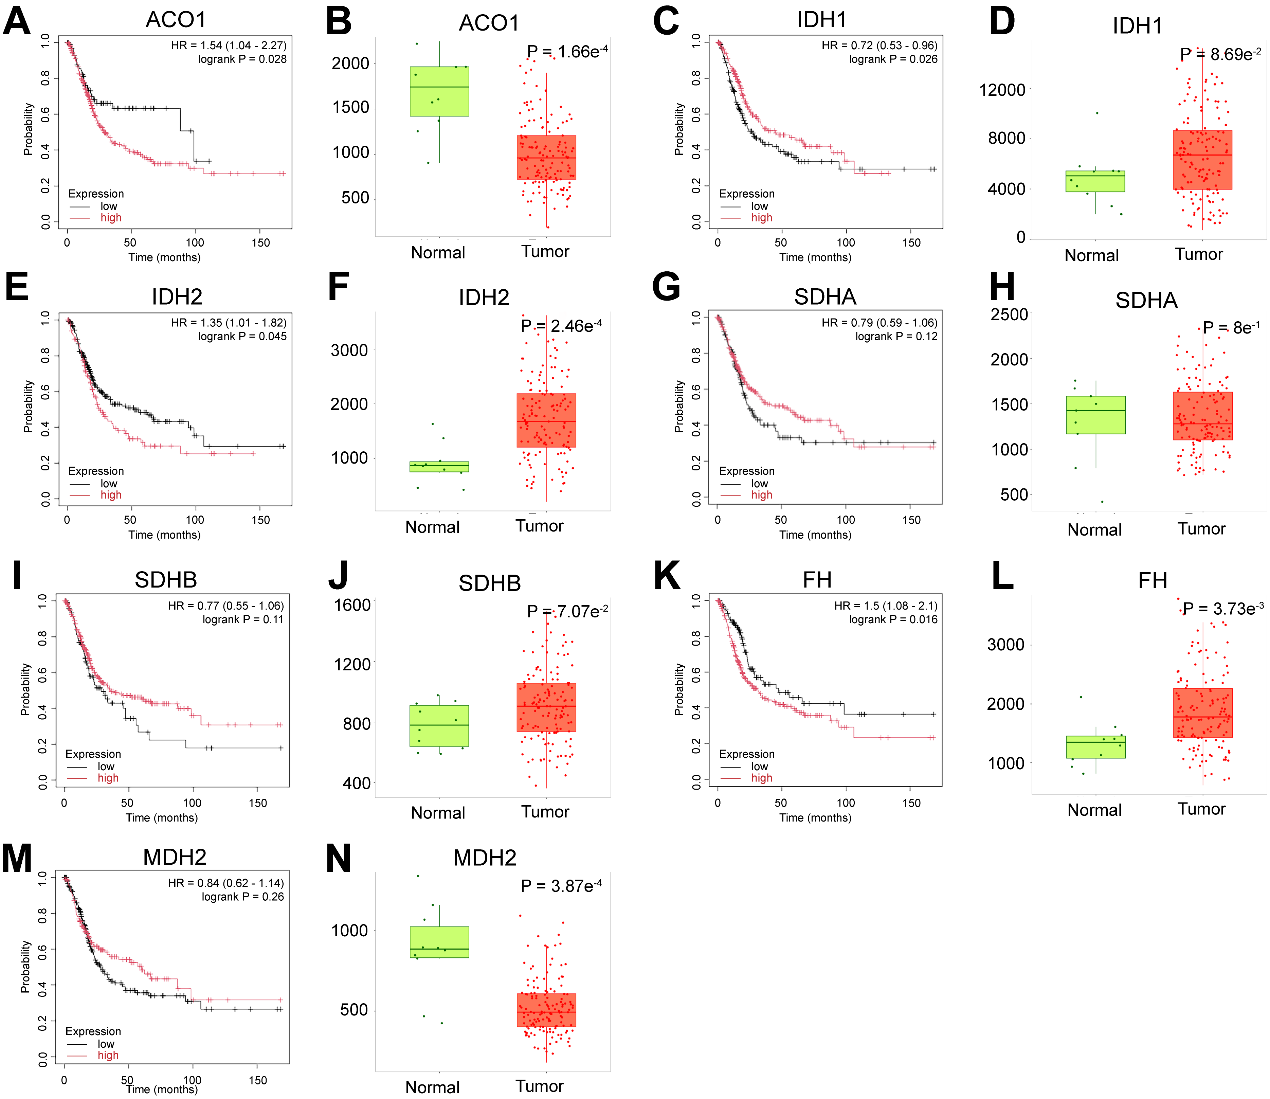


**Fig.S9. Correlation between gene expression and Overall Survivor (OS) probability in BC tissues, and gene expression levels between normal tissues and BC tissues.**

(**A, C, E, G, I, K, M**) Correlation between the expression of ACO1, IDH1, IDH2, SDHA, SDHB, FH, MDH2 and OS probability in BC tissues.

(**B, D, F, H, J, L, N**) The expression levels of ACO1, IDH1, IDH2, SDHA, SDHB, FH and MDH2 between normal tissues and BC tissues.

**Supplementary Figure S10**

**
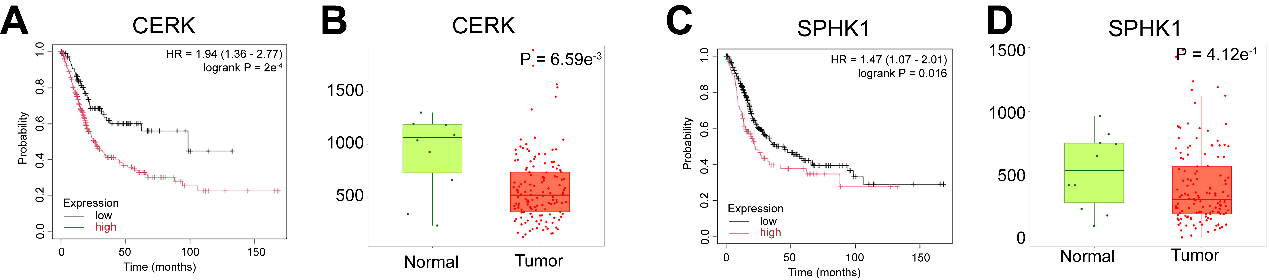
**

**Fig.S10. Correlation between gene expression and Overall Survivor (OS) probability in BC tissues, and gene expression levels between normal tissues and BC tissues.**

(**A, C**) Correlation between the expression of CERK and SPHK1 and OS probability in BC tissues.

(**B, D**) The expression levels of CERK and SPHK1 between normal tissues and BC tissues.

**Supplementary Figure S11**

**
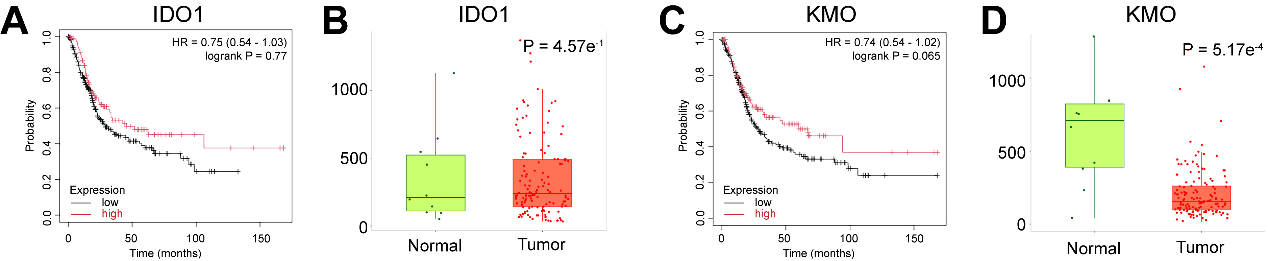
**

**Fig.S11. Correlation between gene expression and Overall Survivor (OS) probability in BC tissues, and gene expression levels between normal tissues and BC tissues.**

(**A, C**) Correlation between the expression of IDO1, KMO and OS probability in BC tissues.

(**B, D**) The expression levels of IDO1 and KMO between normal tissues and BC tissues.

**Supplementary Figure S12**


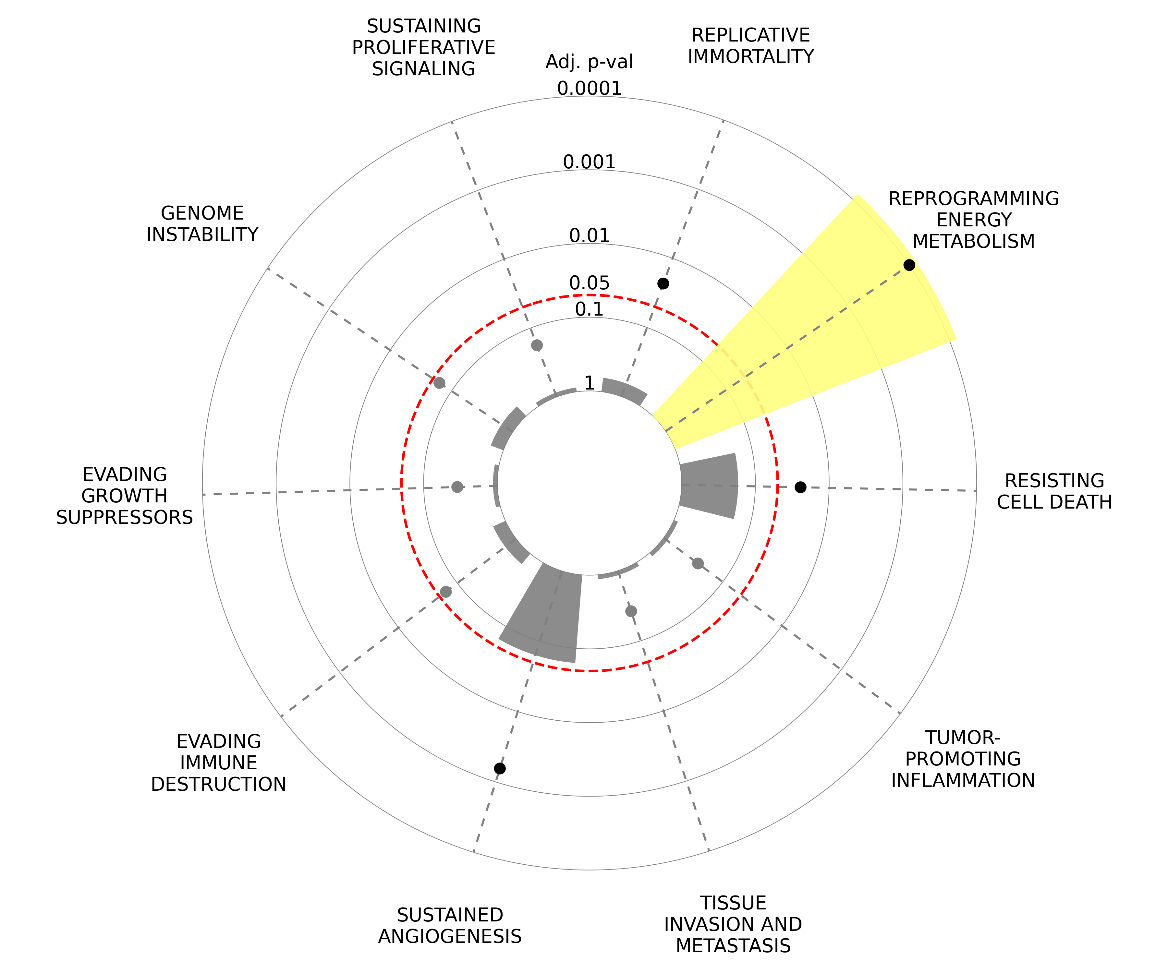


**Fig.S12. Hallmark Enrichment Plot of all the genes mentioned in the article.**
